# Supplementary material for: Reliability and relevance evaluations of REACH data
Source: Royal Society of Chemistry journal article supplement (doi:10.1039/c8tx00216a), 2018-10-15
Supplement: c8tx00216a1.xlsx [file c8tx00216a1.xlsx]

## Sheet: SI Table a (Reliability 1) 
Reliability category 1
Table a. Analysis of the rationales for reliability provided in the field "Rationales for reliability incl. deficiencies" for study summaries assigned reliability category 1 as well as reported GLP and test guideline compliance in the fields “GLP compliance” and “test qualifier”. Data on the endpoint repeated dose toxicity was retrieved for 60 substances from the lead registration dossiers in the…
Study report; key study		Analysis of rational for reliability						Reported GLP and test guideline compliance
EC Number	Reported rational for reliability incl. deficiences	Reliability specified	GLP and/or guideline mentioned	GLP and/or guideline only	Restriction mentioned	Restriction specified	Read-across	GLP compliance	Test guideline qualifier
249-951-5	GLP study according to OECD guideline 411	–	x	x	–	–	–	–	–
232-752-2	The study was performed according to OECD and EC guidelines, and in compliance with GLP.	–	x	x	–	–	–	–	–
275-809-7	well documented study performed according to OECD test guideline	–	x	–	–	–	–	–	–
248-131-4	This study is classified as reliable without restrictions because it closely followed OECD 407 guidelines and was GLP compliant.	x	x	x	–	–	–	–	–
620-174-7	Guideline study	–	x	x	–	–	–	–	–
934-268-3	This study is classified as reliable without restrictions because it closely followed OECD 407 guidelines and was GLP compliant.	x	x	x	–	–	–	–	–
202-969-7	GLP and Guideline study	–	x	x	–	–	–	–	–
204-211-0	OECD GLP and Japanese GLP study	–	x	x	–	–	–	–	–
226-775-7	Study was conducted according to OECD guideline 408 and under GLP conditions. Report is well-documented.	–	x	–	–	–	–	–	–
249-951-5	GLP study according to OECD guideline 408	–	x	x	–	–	–	Yes	according to
203-962-1	Well reported guideline study.	–	x	–	–	–	–	yes (incl. Certificate)	–
203-962-1	Well reported guideline study	–	x	–	–	–	–	yes (incl. Certificate)	–
213-561-3	Study in agreement with OECD Guideline 408 and GLP.	–	x	x	–	–	–	Yes	in agreement with
213-561-3	guideline study (OECD TG 407)	–	x	x	–	–	–	–	–
222-182-2	GLP guideline study	–	x	x	–	–	–	Yes	–
222-182-2	GLP guideline study	–	x	x	–	–	–	Yes	–
222-182-2	GLP guideline study	–	x	x	–	–	–	–	–
252-104-2	GLP guideline study	–	x	x	–	–	–	Yes	–
229-962-1	GLP guideline study (OECD 408)	–	x	x	–	–	–	Yes	–
229-962-1	GLP guideline study (OECD 413)	–	x	x	–	–	–	Yes	–
932-019-3	OECD Guideline study conducted under GLP conditions at professional contract laboratory	–	x	x	–	–	–	yes (incl. Certificate)	–
248-131-4	This study is classified as reliable without restrictions because the study was compliant with GLPs set forth by OECD [ENV/MC/CHEM(98)17], and the study design was based on OECD guideline 422. The study is well documented and scientifically acceptable.	x	x	–	–	–	–	Yes	based on
248-131-4	This study is classified as ‘reliable without restriction’ because it appears to have closely followed OECD Guideline 408 and was conducted according to GLP. The study is scientifically sound and well documented.	x	x	–	–	–	–	Yes	closely followed
248-131-4	This study is classified as reliable without restrictions because it was conducted according to OECD 422 and was GLP compliant.	x	x	x	–	–	–	Yes	–
248-131-4	This study is classified as reliable without restriction because it adhered closely to OECD guidline 407, EU Method B.7, and Commission Directive 2004/9/EC. The study also follwowed GLP.	x	x	x	–	–	–	–	adhered closely to
248-131-4	This study is classified as reliable without restrictions because it was conducted according to OECD 413 guidelines and was GLP compliant.	x	x	x	–	–	–	Yes	according to
256-181-3	Well documented report of a guideline study.	–	x	–	–	–	–	No	–
256-181-3	Well documented report of a guideline study conducted to GLP.	–	x	–	–	–	–	yes (incl. Certificate)	–
203-872-2	GLP and guideline study	–	x	x	–	–	–	Yes	–
203-872-2	GLP and guideline study	–	x	x	–	–	–	Yes	–
272-221-2	Guideline- and GLP-compliant study	–	x	x	–	–	–	yes (incl. Certificate)	–
203-452-9	GLP compliant, guideline study, available as unpublished report, fully adequate for assessment	–	x	–	–	–	–	yes (incl. Certificate)	–
203-710-0	GLP study	–	x	x	–	–	–	yes (incl. Certificate)	–
500-033-5	Study was conducted according to GLP as well as Guidelines.	–	x	x	–	–	–	Yes	according to
500-033-5	Study was conducted according to GLP as well as Guidelines.	–	x	x	–	–	–	Yes	according to
500-033-5	Study was conducted according to GLP as well as Guidelines.	–	x	x	–	–	–	Yes	according to
225-878-4	GLP-study according to OECD guideline	–	x	x	–	–	–	Yes	according to
225-878-4	GLP-study equivalent to OECD guideline	–	x	x	–	–	–	Yes	equivalent to
225-878-4	GLP-study according to OECD guideline	–	x	x	–	–	–	yes (incl. Certificate)	according to
220-666-8	Guideline study	–	x	x	–	–	–	Yes	–
603-923-2	GLP guideline study.	–	x	x	–	–	–	Yes	–
603-923-2	GLP guideline study.	–	x	x	–	–	–	Yes	–
603-923-2	GLP guideline study.	–	x	x	–	–	–	Yes	–
603-923-2	GLP guideline study.	–	x	x	–	–	–	Yes	–
242-393-3	Fully GLP- and guideline compliant	–	x	x	–	–	–	yes (incl. Certificate)	–
223-861-6	Guideline study	–	x	x	–	–	–	–	–
223-861-6	Guideline study	–	x	x	–	–	–	Yes	–
225-863-2	well-conducted guideline study	–	x	–	–	–	–	yes (incl. Certificate)	–
201-250-5	OECD guideline study, GLP certified.	–	x	x	–	–	–	yes (incl. Certificate)	–
934-268-3	This study is classified as reliable without restrictions because the study was compliant with GLPs set forth by OECD [ENV/MC/CHEM(98)17], and the study design was based on OECD guideline 422. The study is well documented and scientifically acceptable.	x	x	–	–	–	–	Yes	based on
934-268-3	This study is classified as ‘reliable without restriction’ because it appears to have closely followed OECD Guideline 408 and was conducted according to GLP. The study is scientifically sound and well documented.	x	x	–	–	–	–	Yes	appears to have closely followed
934-268-3	This study is classified as reliable without restrictions because it was conducted according to OECD 422 and was GLP compliant.	x	x	x	–	–	–	Yes	according to
934-268-3	This study is classified as reliable without restriction because it adhered closely to OECD guidline 407, EU Method B.7, and Commission Directive 2004/9/EC. The study also follwowed GLP.	x	x	x	–	–	–	Yes	adhered closely to
934-268-3	This study is classified as reliable without restrictions because it was conducted according to OECD 413 guidelines and was GLP compliant.	x	x	x	–	–	–	Yes	according to
641-136-6	well documented study according to OECD Guideline and GLP	–	x	–	–	–	–	Yes	according to
641-136-6	well documented study according to OECD Guideline and GLP	–	x	–	–	–	–	Yes	according to
201-557-4	Guideline-Studie (GLP, QAU)	–	x	x	–	–	–	yes (incl. Certificate)	–
201-557-4	Guideline-Studie (GLP, QAU)	–	x	x	–	–	–	yes (incl. Certificate)	–
272-221-2	GLP guideline study.	–	x	x	–	–	–	yes (incl. Certificate)	–
201-553-2	GLP, guideline study, animal experimental study with minor restrictions, fully adequate for assessment	–	x	–	x	–	–	Yes	–
222-182-2	GLP guideline study however with following deviation: no functional observations on neurobehavioural effects were conducted.	–	x	–	x	x	–	Yes	–
247-148-4	Study conducted in compliance with agreed protocols, with no or minor deviations from standard test guidelines and/or minor methodological deficiencies, which do not affect the quality of the relevant results.	–	x	–	x	–	–	Yes	–
438-390-3	Study conducted in accordance with generally accepted scientific principles, possibly with incomplete reporting or methodological deficiencies, which do not affect the quality of relevant results. This study is classified as reliable without restrictions because it was GLP compliant and was conducted according to OECD 407 guidelines	x	x	–	x	–	–	Yes	according to
438-390-3	Study conducted in accordance with generally accepted scientific principles, possibly with incomplete reporting or methodological deficiencies, which do not affect the quality of relevant results. This study is classified as reliable without restriction because it was conducted according to GLP, is scientifically acceptable and appears to have adhered to the OECD guideline recommendations.	x	x	–	x	–	–	Yes	appears to have adhered to
249-951-5	GLP study equivalent to OECD guideline 412	–	x	x	–	–	–	Yes	equivalent to
249-951-5	GLP study equivalent to OECD guideline 412	–	x	x	–	–	–	Yes	equivalent to
201-133-9	Study was conducted according to an equivalent of OECD guideline 407 and under GLP conditions.	–	x	x	–	–	–	Yes	equivalent to
225-878-4	GLP study equivalent to OECD guideline	–	x	x	–	–	–	Yes	equivalent to
203-539-1	This study was conducted in accordance with GLP and equivalent to OECD guideline 410.	–	x	x	–	–	–	Yes	equivalent to
203-919-7	A well reported GLP study conducted under a guideline equivalent protocol.	–	x	–	–	–	–	Yes	equivalent to
620-174-7	Comparable to guideline study	–	x	x	–	–	–	Yes	comparable to
700-976-4	Acceptable, well-documented study report equivalent or similar to OECD guideline 408: GLP	–	x	–	–	–	–	Yes	equivalent or similar to
700-976-4	Acceptable, well-documented study report equivalent or similar to OECD guideline 413.	–	x	–	–	–	–	No data	equivalent or similar to
284-325-5	well documented study equivalent to OECD 407 guideline	–	x	–	–	–	–	Yes	equivalent to
231-152-8	reliable without restriction. Well documented and scientifically acceptable. Method comparable to OECD Guideline.	–	x	–	–	–	–	Yes	comparable to
231-152-8	reliable without restriction. Well documented and scientifically acceptable. Method comparable to OECD Guideline.	–	x	–	–	–	–	Yes	comparable to
275-809-7	well documented study performed	–	–	–	–	–	–	Yes	–
	Total	14	76	51	5	1	0
Study report; supporting study		Analysis of rational for reliability						Reported GLP and test guideline compliance
EC Number	Reported rational for reliability incl. deficiences	Reliability specified	GLP and/or guideline	Only GLP and/or guideline	Restriction	Restriction specified	Read-across	GLP compliance	Test guideline qualifier
438-390-3	Study conducted in accordance with generally accepted scientific principles, possibly with incomplete reporting or methodological deficiencies, which do not affect the quality of relevant results. This study is classified as reliable without restrictions because it was GLP compliant and was conducted according to OECD 408 guidelines.	x	x	–	x	–	–	Yes	according to
700-976-4	According to or similar to guideline study OECD 408: no data on GLP.	–	x	x	–	–	–	No data	According to or similar to
500-033-5	The study was comparable to a guideline study and was GLP.	–	x	x	–	–	–	Yes	comparable to
249-951-5	GLP-study according to OECD guideline 407	–	x	x	–	–	–	Yes	–
248-131-4	This study is classified as reliable without restrictions because it followed OECD 407 guidelines (ca. 1981) and was GLP compliant.	x	x	x	–	–	–	Yes	followed
225-878-4	GLP-study according to OECD guideline	–	x	x	–	–	–	Yes	–
603-923-2	GLP guideline study.	–	x	x	–	–	–	Yes	–
603-923-2	GLP guideline study.	–	x	x	–	–	–	Yes	–
603-923-2	GLP guideline study.	–	x	x	–	–	–	Yes	–
603-923-2	GLP guideline study.	–	x	x	–	–	–	Yes	–
225-863-2	well-conducted guideline study	–	x	–	–	–	–	yes (incl. Certificate)	–
225-863-2	well-conducted study according to OECD TG 421, which primarily examines the effects on reproduction and development	–	x	–	–	–	–	–	according to
934-268-3	This study is classified as reliable without restrictions because it followed OECD 407 guidelines (ca. 1981) and was GLP compliant.	x	x	x	–	–	–	Yes	followed
229-962-1	GLP guideline study (OECD 422) of a structural analogue. PACM and DM-PACM are considered read-across analogues based on structural similarity and similar physico-chemical and toxicological properties. The common structural features of the two substances are: a common functional primary amine group; the amines are bound to a cyclic aliphatic organic substituent; there are no elements other than ca…	–	x	–	–	–	x	–	–
272-727-3	GLP Guideline Study. For a detailed read across justification please see also IUCLID chapter 13.	–	x	–	–	–	x	yes (incl. Certificate)	–
247-148-4	Study conducted in compliance with agreed protocols, with no or minor deviations from standard test guidelines and/or minor methodological deficiencies, which do not affect the quality of the relevant results.	–	x	–	x	–	–	yes (incl. Certificate)	–
438-390-3	Study conducted in accordance with generally accepted scientific principles, possibly with incomplete reporting or methodological deficiencies, which do not affect the quality of relevant results. This study is classified as reliable without restrictions because it closely followed OECD 407 guidelines and was GLP compliant.	x	x	–	x	–	–	Yes	closely followed
202-969-7	GLP study comparable to guideline study	–	x	x	–	–	–	Yes	comparable to
249-951-5	GLP-study equivalent to OECD guideline 407	–	x	x	–	–	–	Yes	equivalent to
603-923-2	Comparable to GLP guideline study. Guideline adapted to the needs of a shorter study duration (subchronic to subacute).	–	x	–	–	–	–	Yes	comparable to
438-390-3	Study conducted in accordance with generally accepted scientific principles, possibly with incomplete reporting or methodological deficiencies, which do not affect the quality of relevant results. This study is classified as reliable without restrictions because it was compliant with GLPs. Additionally, methods used for the 91-day oral exposure part of the study appear to closely follow OECD 408.	x	x	–	x	–	–	Yes	closely follow
226-775-7	GLP, but study scope does not cover a full OECD 407 study	–	x	x	–	–	–	yes (incl. Certificate)	–
	Total	5	22	13	4	0	2
Study report; weight of evidence		Analysis of rational for reliability						Reported GLP and test guideline compliance
EC Number	Reported rational for reliability incl. deficiences	Reliability specified	GLP and/or guideline	Only GLP and/or guideline	Restriction	Restriction specified	read-across	GLP compliance	Test guideline qualifier
203-872-2	GLP and guideline study.	–	x	x	–	–	–	Yes	–
	Total	0	1	1	0	0	0
Publication; key study		Analysis of rational for reliability						Reported GLP and test guideline compliance
EC Number	Reported rational for reliability incl. deficiences	Reliability specified	GLP and/or guideline	Only GLP and/or guideline	Restriction	Restriction specified	Read-across	GLP compliance	Test guideline qualifier
203-962-1	GLP guideline study	–	x	x	–	–	–	Yes	–
245-883-5	GLP guideline study	–	x	x	–	–	–	Yes	–
270-299-2	Guideline study and GLP	–	x	x	–	–	–	Yes	–
204-211-0	GLP guideline study	–	x	x	–	–	–	Yes	–
201-245-8	Conducted under OECD test guidelines and Good Laboratory Practice (GLP) guidelines.	–	x	x	–	–	–	Yes	conducted under
204-211-0	GLP guideline study	–	x	x	–	–	–	Yes	–
	Total	0	6	6	0	0	0
Publication; supporting study		Analysis of rational for reliability						Reported GLP and test guideline compliance
EC Number	Reported rational for reliability incl. deficiences	Reliability specified	GLP and/or guideline	Only GLP and/or guideline	Restriction	Restriction specified	Read-across	GLP compliance	Test guideline qualifier
231-152-8	Reliable without restriction. Well documented and scientifically acceptable	–	–	–	–	–	–	No data	–
	Total	0	0	0	0	0	0

## Sheet: SI Table b (Reliability 2)
Reliability category 2
Table b. Analysis of the rationales for reliability provided in the field "Rationales for reliability incl. deficiencies" for study summaries assigned reliability category 2 as well as reported GLP and test guideline compliance in the fields “GLP compliance” and “test qualifier”. Data on the endpoint repeated dose toxicity was retrieved for 60 substances from the lead registration dossiers in the…
Study report; key study		Analysis of rational for reliability								Reported GLP and test guideline compliance
		Reliability specified	GLP and/or guideline mentioned	Pre-GLP and/or pre-guideline	Non-GLP and/or non-guideline	Only GLP and/or guideline	Restriction	Restriction specified	Read-across	GLP compliance	Test guideline qualifier
226-775-7	Study was not conducted under GLP and according to an OECD guideline. However, the experimental design resembles OECD guideline 410 and the report is well documented.	–	x	–	–	–	–	–	–	No	equivalent or similar to
213-561-3	Basic data given: comparable to guidelines (limitations: e.g. no clinical biochemistry, no detailed clinical observations, no functional observations, only 4-5 days post observation period, no reporting of individual/mean data, especially on food consumption and body weight development)	–	x	–	–	–	x	x	–	No data	–
249-828-6	Study was not performed according to GLP, but equivalent or similar to OECD408.	–	x	–	–	x	–	–	–	No	equivalent or similar to
222-182-2	Guideline study performed according to GLP principles, but without quality check by the quality assurance unit, therefore the study was considered as not GLP. Following deviations from the initial protocol and from the guideline were observed/mentioned: - Only two dose levels were tested. - Due to the limited amount of blood available in young mice sodium and potassium plasma levels were not meas…	–	x	–	–	–	x	x	–	No	according to
222-182-2	The study was conducted prior to the implementation of guidelines, but followed essentially the procedure described by OECD 409. Referring to this guideline, following deviations were observed: - The test material was not characterised. However, according to Ciba's internal records, the test material with the internal code "CH 3565" represents triclosan of a purity of 99.3%. - The highest dose le…	–	x	–	–	–	x	x	–	No	equivalent or similar to
271-094-0	well documented study performed according to OECD test guideline	–	x	–	–	–	–	–	–	Yes	equivalent or similar to
271-094-0	well documented study performed, read-across	–	–	–	–	–	–	–	x	Yes	no guideline followed
204-709-8	meets generally accepted scientific standards, well-documented, and acceptable for assessment	–	–	–	–	–	–	–	–	yes (incl. Certificate)	equivalent or similar to
261-385-0	Acceptable, well-documented study report which meets basic scientific principles	–	–	–	–	–	–	–	–	No	equivalent or similar to
234-186-1	Study conducted in compliance with agreed protocols, with no or minor deviations from standard test guidelines and/or minor methodological deficiencies, which do not affect the quality of the relevant results.	–	x	–	–	–	x	–	–	yes (incl. Certificate)	according to
201-133-9	Study was conducted according to methods resembling the OECD guideline 411. However, the study design is reliable and the report is well-documented.	–	x	–	–	–	–	–	–	Yes	equivalent or similar to
203-872-2	basic information given.	–	–	–	–	–	–	–	–	No	–
201-126-0	Study well documented, meets generally accepted scientific principles, acceptable for assessment	–	–	–	–	–	–	–	–	No	–
310-079-6	Orientating repeated dose toxicity study, conducted prior to the implementation of currently acknowledged testing guidelines such as the OECD TG 408, and according to an in-house protocol. Even if the study conduct does not fulfill current requirements, suitable basic data were given.	–	–	x	–	–	x	x	–	No	–
203-919-7	A GLP study conducted with protocol equivalent to guideline study.	–	x	–	–	x	–	–	–	Yes	equivalent or similar to
260-350-7	The study was conducted according to the appropriate OECD test guideline, and in compliance with GLP. The study is considered to be reliability 2, because full histopathology of required tissues was not carried out.	x	x	–	–	–	x	x	–	yes (incl. Certificate)	according to
603-931-6	GLP guideline study with acceptable restrictions	–	x	–	–	x	x	–	–	Yes	according to
905-588-0	GLP status not known, near guideline study, published in peer reviewed literature, limitations in design and/or reporting but otherwise adequate for assessment.	–	x	–	–	–	x	–	–	No data	equivalent or similar to
201-622-7	NTP study carried out to national standards that applied at the time. Highest dose in male rats was only about 500 mg/kg bw/day (in modern protocols the recommended top dose is 1000 mg/kg bw/day)	–	x	–	–	–	x	x	–	Yes	equivalent or similar to
201-622-7	Comparable to guideline study with acceptable restrictions	–	x	–	–	x	x	–	–	Yes	equivalent or similar to
201-622-7	NTP study carried out to national standards that applied at the time. Only the data for female rats can be considered reliable and are presented here (males died prematurely from internal haemorrhaging, with only 30% of the high-dose group still alive at week 28, and some deaths occurring amongst low-dose males)	–	x	–	–	–	x	x	–	No data	equivalent or similar to
201-622-7	NTP study, performed under the directions of the National Institute of Environmental Health Sciences (NIEHS), to evaluate the toxicity of repeated exposure to male rats and to determine the appropriate doses for a 2-year study and the potential effects on male reproductive organs.	–	x	–	–	–	–	–	–	Yes	no guideline followed
201-622-7	NTP study carried out to national standards that applied at the time	–	x	–	–	x	–	–	–	No data	equivalent or similar to
201-622-7	Comparable to guideline study with acceptable restrictions	–	x	–	–	x	x	–	–	Yes	equivalent or similar to
201-553-2	Pre-GLP, pre-guildeline study. Available as an unpublished report. Limitations on reporting. Acceptable with restrictions.	–	–	x	–	–	x	–	–	No	–
201-245-8	Acceptable, well-documented study report which meets basic scientific principles and was conducted in compliance with good laboratory practice (GLP) standards.	–	x	–	–	–	–	–	–	Yes	no guideline followed
	Total	1	19	2	0	6	13	7	1
Study report; supporting study		Analysis of rational for reliability								Reported GLP and test guideline compliance
		Reliability specified	GLP and/or guideline	Pre-GLP and/or pre-guideline	Non-GLP and/or non-guideline	Only GLP and/or guideline	Restriction	Restriction specified	Read-across	GLP compliance	Test guideline qualifier
226-775-7	The EPA guideline for the registration of pesticides in the U.S. - the "sub-chronic 21 day dermal toxicity study" was used. Report is well-documented.	–	x	–	–	–	–	–	–	No	equivalent or similar to
232-752-2		–	–	–	–	–	–	–	–	No	no guideline followed
249-828-6	The study was not performed according to GLP, but equivalent or similar to OECD 407 with deviations. The study seems to be a range-finding study for the 90-day feeding study which is included in the dossier as a key study.	–	x	–	–	–	x	x	–	No	equivalent or similar to
222-182-2	The study was conducted according to EPA OPP 82-1 and was consistent with the OECD TG 408 with the exception that urinalysis was not conducted. The findings however are scientifically acceptable and suitable as supporting data.	–	x	–	–	–	x	x	–	Yes	according to
222-182-2	The study is scientifically acceptable but shows following deficiencies: In the test protocol it was specified that the test conduct was intended to generally follow the OECD TG 408; in the study as such, the guideline was not mentioned. In the test protocol it was specified that all documentation records, raw data, and specimens pertaining to the present study would be held for the length of tim…	–	–	–	x	–	x	x	–	No data	equivalent or similar to
252-104-2	This study was conducted in accordance with GLP and comparable to OECD guideline 412	–	x	–	–	x	–	–	–	Yes	equivalent or similar to
252-104-2	This study was conducted in accordance with GLP and comparable to OECD guideline 412	–	x	–	–	x	–	–	–	Yes	equivalent or similar to
275-809-7	GLP compliant study conducted to investigate specific endpoints, read-across	–	x	–	–	–	–	–	x	Yes	no guideline required
271-094-0	GLP compliant study conducted to investigate specific endpoints, read-across	–	x	–	–	–	–	–	x	Yes	no guideline required
204-709-8	Generally in line with the standard protocol. However there was a high incidence of viral infection in test animals (all groups). This was not considered to have affected the outcome of the study (viral infection of eyes only) but additional stress of the eye infection may have caused the animals to react more severely than they otherwise would.	–	–	–	–	–	x	x	–	No data	equivalent or similar to
204-709-8	meets generally accepted scientific standards, well-documented, and acceptable for assessment	–	–	–	–	–	–	–	–	No data	no guideline followed
204-709-8	meets generally accepted scientific standards, well-documented, and acceptable for assessment	–	–	–	–	–	–	–	–	No	no guideline followed
204-709-8	meets generally accepted scientific standards, well-documented, and acceptable for assessment	–	–	–	–	–	–	–	–	No	no guideline followed
204-709-8	meets generally accepted scientific standards, well-documented, and acceptable for assessment	–	–	–	–	–	–	–	–	No data	equivalent or similar to
204-709-8	meets generally accepted scientific standards, well-documented, and acceptable for assessment	–	–	–	–	–	–	–	–	No	no guideline followed
204-709-8	meets generally accepted scientific standards, well-documented, and acceptable for assessment	–	–	–	–	–	–	–	–	No	no guideline followed
204-709-8	meets generally accepted scientific standards, well-documented, and acceptable for assessment	–	–	–	–	–	–	–	–	No	equivalent or similar to
212-454-9	Well documented study report, acceptable for assessment, with restrictions (no data on test substance purity). In the study report, test parameters didn’t totally comply with the specific testing guideline, but were sufficient to accept data and study was conducted prior to the advent of GLP regulations (1982).	–	x	–	–	–	x	x	–	No	–
212-454-9	Well documented study report which meets basic scientific principles, acceptable for assessment	–	–	–	–	–	–	–	–	No	–
212-454-9	Well documented study report which meets basic scientific principles, acceptable for assessment	–	–	–	–	–	–	–	–	No	–
212-454-9	Well documented study report which meets basic scientific principles, acceptable for assessment	–	–	–	–	–	–	–	–	No	–
212-454-9	Well documented study report which meets basic scientific principles, acceptable for assessment	–	–	–	–	–	–	–	–	No	–
201-133-9	Study was conducted under GLP conditions and according to OECD guideline 407. Due to the read-across purpose it was given a Klimisch 2 rating, in accordance with the ECHA Practical guide #6 on the reporting of read-across in IUCLID. Linalool and Dehydrolinalool have almost identical chemical structures. The only difference is the triple bond at position 1 in Dehydrolinalool compared to a double b…	x	x	–	–	–	–	–	x	Yes	according to
932-019-3	Reliability from SIDS summary and additional information from original report in Japanese. See Section 13 for read-across justification.	–	–	–	–	–	–	–	x	No data	–
932-019-3	Study lacking some of the details in documentation. Read-across based on ECHA and SIDS study summary availability plus additional information received from study report in Japanese. See Section 13 for read-across justification.	–	–	–	–	–	x	–	x	No	equivalent or similar to
248-131-4	This study is classified as reliable with restrictions because it was carried out according to OECD 408 and was GLP compliant, but the stated NOAEL is questionable due to some study limitations.	x	x	–	–	–	x	x	–	Yes	according to
248-131-4	This study is classified as reliable with restrictions because there was no statement to indicate that it was conducted according to GLP standards, but it was generally conducted according to OECD 412 guidelines.	x	x	–	–	–	x	x	–	No data	equivalent or similar to
248-131-4	This study is classified as reliable with restrictions because even though it was conducted according to GLP standards, it did not conform to accepted harmonized guidelines, and only two exposure concentrations were used.	x	x	–	–	–	x	x	–	Yes	no guideline followed
248-131-4	This study is classified as reliable with restrictions because even though it was conducted according to GLP standards, it did not conform to accepted harmonized guidelines, and only two exposure concentrations were used.	x	x	–	–	–	x	x	–	Yes	no guideline available
500-033-5	This study was conducted prior to GLP and test guidelines but sufficient data is available for the interpretation of results.	–	–	x	–	–	–	–	–	No	no guideline followed
500-033-5	Study was conducted in accordance with GLP, but it was a probe study.	–	x	–	–	–	–	–	–	Yes	equivalent or similar to
500-033-5	This study was conducted prior to GLP and test guidelines, but sufficient data is available for interpretation of results	–	–	x	–	–	–	–	–	No	–
500-033-5	GLP guideline study, Note: It is a 2-week probe study.	–	x	–	–	–	–	–	–	Yes	equivalent or similar to
225-878-4	non-GLP study similar to OECD guideline	–	x	–	–	x	–	–	–	No	equivalent or similar to
203-539-1	The study was conducted under GLP and equivalent to OECD guideline 412.	–	x	–	–	x	–	–	–	Yes	equivalent or similar to
203-539-1	This study was conducted in accordance with GLP, well documented and similar to OECD guideline 413.	–	x	–	–	–	–	–	–	Yes	no guideline available
203-539-1	This study was conducted under GLP and equivalent to OECD guideline 412.	–	x	–	–	x	–	–	–	Yes	equivalent or similar to
203-539-1	This study was conducted in accordance with GLP and well documented and similar to OECD guideline 413	–	x	–	–	–	–	–	–	Yes	equivalent or similar to
203-539-1	The study was conducted prior to GLP and test guidelines	–	–	x	–	x	–	–	–	No	no guideline available
203-919-7	Well reported study. not to GLP. Some deviations from a normal protocol but none that would make results unreliable.	–	–	–	x	–	x	–	–	No	equivalent or similar to
201-250-5	Guideline study (Guidelines for 28-Day Repeat Dose Toxicity Testing of Chemicals - Japan) with restrictions (original report in Japanese, Englisch translation), but test method and parameters investigated are identical to OECD 407.	–	x	–	–	–	x	x	–	–	according to
260-350-7	The study was conducted according to a national standard method, and in compliance with GLP. The test substance was similar to the registered substance but contained a higher proportion of an S3 isomer. The original study and the read-across are considered to be reliability 2.	x	x	–	–	–	x	x	x	yes (incl. Certificate)	according to
438-390-3	Study conducted in accordance with generally accepted scientific principles, possibly with incomplete reporting or methodological deficiencies, which do not affect the quality of relevant results. This study is classified as reliable with restriction because although the study closely adhered to OECD 407 guidelines, haematology, clinical biochemistry, and neurobehavioral assessments were not cond…	x	x	–	–	–	x	x	–	Yes	equivalent or similar to
934-268-3	This study is classified as reliable with restrictions because it was carried out according to OECD 408 and was GLP compliant, but the stated NOAEL is questionable due to some study limitations.	x	x	–	–	–	x	x	–	Yes	according to
934-268-3	This study is classified as reliable with restrictions because there was no statement to indicate that it was conducted according to GLP standards, but it was generally conducted according to OECD 412 guidelines.	x	x	–	–	–	x	x	–	No data	equivalent or similar to
934-268-3	This study is classified as reliable with restrictions because even though it was conducted according to GLP standards, it did not conform to accepted harmonized guidelines, and only two exposure concentrations were used.	x	x	–	–	–	x	x	–	Yes	no guideline followed
934-268-3	This study is classified as reliable with restrictions because even though it was conducted according to GLP standards, it did not conform to accepted harmonized guidelines, and only two exposure concentrations were used.	x	x	–	–	–	x	x	–	Yes	no guideline available
905-588-0	GLP status not known, near guideline study, published in peer reviewed literature, limitations in design and/or reporting but otherwise adequate for assessment.	–	x	–	–	–	x	–	–	No	no guideline followed
905-588-0	GLP status not known, near guideline study, published in peer reviewed literature, limitations in design and/or reporting but otherwise adequate for assessment.	–	x	–	–	–	x	–	–	No	no guideline followed
204-211-0	Study well documented, acceptable for assessment	–	–	–	–	–	–	–	–	No data	equivalent or similar to
204-211-0	Comparable to guideline study with acceptable restrictions	–	x	–	–	–	x	–	–	Yes	no guideline followed
204-211-0	2e: Study well documented, acceptable for assessment	–	–	–	–	–	–	–	–	No data	equivalent or similar to
201-622-7	Comparable to guideline study with acceptable restrictions	–	x	–	–	–	x	–	–	Yes	equivalent or similar to
201-245-8	Acceptable, well-documented study report	–	–	–	–	–	–	–	–	No	no guideline followed
201-245-8	Acceptable, well-documented study report	–	–	–	–	–	–	–	–	No	no guideline followed
260-350-7	The study was conducted according to the appropriate OECD test guideline, and in compliance with GLP. The original study and the read-across of the result are considered to be reliability 2. A restriction in the study was the lack of full histopathology on the 32 tissues required by OECD TG 407.	x	x	–	–	–	x	x	x	yes (incl. Certificate)	according to
260-350-7	The study was conducted according to a national standard method, and in compliance with GLP. The original study and the read-across of the result are considered to be reliability 2. A restriction in the study was the lack of full histopathology on the 32 tissues required by OECD TG 407.	x	x	–	–	–	x	x	x	Yes	according to
204-211-0	comparable to guideline study, acceptable for assessment, with restrictions	–	x	–	–	–	x	–	–	Yes	equivalent or similar to
	Total	13	34	3	2	6	25	18	8
Study report; adequacy not specified		Analysis of rational for reliability								Reported GLP and test guideline compliance
		Reliability specified	GLP and/or guideline	Pre-GLP and/or pre-guideline	Non-GLP and/or non-guideline	Only GLP and/or guideline	Restriction	Restriction specified	Read-across	GLP compliance	Test guideline qualifier
222-182-2	No guideline was mentioned/followed, however the test conduct was in principle similar to OECD TG 452, with consideration for tumor formation. The test material was not well characterized and described in the report, and no analytical purity was given; however, according to " Trosan supplement I to EU dossier submitted 18 August 2009", the purity of CIBA-produced Triclosan exceeded 99%, and Irgas…	–	x	–	–	–	x	x	–	No	no guideline followed
225-863-2	A pilot dose-range finding study	–	–	–	–	–	–	–	–	yes (incl. Certificate)	–
204-211-0	2e: Study well documented, acceptable for assessment	–	–	–	–	–	–	–	–	No data	no guideline followed
204-211-0	2e: Study well documented, acceptable for assessment	–	–	–	–	–	–	–	–	No data	no guideline followed
	Total	0	1	0	0	0	1	1	0
Publication; key study		Analysis of rational for reliability								Reported GLP and test guideline compliance
		Reliability specified	GLP and/or guideline	Pre-GLP and/or pre-guideline	Non-GLP and/or non-guideline	Only GLP and/or guideline	Restriction	Restriction specified	Read-across	GLP compliance	Test guideline qualifier
203-962-1	GLP guideline study with acceptable restriction (Neurotoxicity study with uncomplete extend of examinations for a subchronic study, i.e. no hematological/ clinicochemical observations and no urinalysis performed)	–	x	–	–	–	x	x	–	Yes	according to
234-186-1	Preferred study for this SIDS endpoint. Study predates GLP; however, method was comparable to OECD Guideline 408. The effect of DBT exposure on the thymus of was not assessed in this study. No information on the stability or homogeneity of the test material in the DBTC-prepared diets.	–	x	–	–	–	x	x	–	No	equivalent or similar to
245-883-5	GLP guideline study with acceptable restriction (Neurotoxicity study with uncomplete extend of examinations for a subchronic study, i.e. no hematological/ clinicochemical observations and no urinalysis performed)	–	x	–	–	–	x	x	–	Yes	according to
201-126-0	Accepted study design. Restriction: Insufficient documentation on histopathology.	–	–	–	–	–	x	x	–	No data
201-126-0	Accepted study design. Restriction: Insufficient documentation on histopathology.	–	–	–	–	–	x	x	–	No data
201-126-0	Study well documented, meets generally accepted scientific principles, acceptable for assessment	–	–	–	–	–	–	–	–	No data
908-918-1	The study was conducted in accordance with TSCA guidelines under GLP and foccused on neurotoxicity/respiratory tract (no evaluation of systemic toxicity effects (clinical chemistry, haematology, urinalysis, effects on other organs besides neurological system).	–	x	–	–	–	x	x	–	No data
603-931-6	GLP-Guideline study with acceptable restrictions Publication with summarized results	–	x	–	–	–	x	–	–	Yes	according to
905-588-0	GLP status not known, near guideline study, published in peer reviewed literature, limitations in design and/or reporting but otherwise adequate for assessment.	–	x	–	–	–	x	–	–	No data	equivalent or similar to
214-604-9	A code of 2 “Reliable with restrictions” was applied for the following reasons: (1) These studies were conducted before the implementation of GLP standards at the US NTP; however, a data audit was performed, and no problems were identified that affected the interpretation of the study. (2) No guideline was followed. The available OECD and Office of Prevention, Pesticides and Toxic Substances guid…	x	–	–	–	–	x	x	–	No	no guideline followed
284-325-5	GLP guideline study; no detals on isomer composition	–	x	–	–	–	x	x	–	Yes	equivalent or similar to
231-152-8	Reliable with restriction. Well documented. Not according to GLP Method not in compliance with ER 67/548/EEC, Annex V and OECD test guidelines	–	–	–	x	–	x	–	–	No
231-152-8	Reliable with restriction. Well documented. Not according to GLP Method not in compliance with ER 67/548/EEC, Annex V and OECD test guidelines	–	–	–	x	–	x	–	–	No
231-152-8	Reliable with restriction. Well documented. Not according to GLP Method not in compliance with ER 67/548/EEC, Annex V and OECD test guidelines	–	–	–	x	–	x	–	–	No
231-152-8	Considered by EU Risk Assessment Report (2007) as key study for risk evaluation	–	–	–	–	–	–	–	–	No data	no guideline followed
231-152-8	Reliable with restriction. Not according to GLP Method not in compliance with ER 67/548/EEC, Annex V and OECD test guidelines.	–	–	–	x	–	x	–	–	No
201-557-4	taken from EU RAR	–	–	–	–	–	–	–	–	Yes	according to
201-167-4	Non-GLP, non-guideline study, however well documented and scientifically acceptable.	–	–	–	x	–	–	–	–	No
201-167-4	Non-GLP, non-guideline study, however well documented and scientifically acceptable.	–	–	–	x	–	–	–	–	No
	Total	1	7	0	6	0	14	8	0
Publication; supporting study		Analysis of rational for reliability								Reported GLP and test guideline compliance
		Reliability specified	GLP and/or guideline	Pre-GLP and/or pre-guideline	Non-GLP and/or non-guideline	Only GLP and/or guideline	Restriction	Restriction specified	Read-across	GLP compliance	Test guideline qualifier
203-962-1	Acceptably documented study which meets basic scientific principles and contains sufficient detail to be able to judge the results reliable as a contribution to the understanding of the repeat dose toxicity of this substance.	–	–	–	–	–	–	–	–	No data	equivalent or similar to
247-148-4	Study conducted in accordance with generally accepted scientific principles, possibly with incomplete reporting or methodological deficiencies, which do not affect the quality of the relevant results.	–	–	–	–	–	x	–	–	No data	according to
252-104-2	This study was conducted similar to OECD guideline 410.	–	x	–	–	x	–	–	–	No data	equivalent or similar to
275-809-7	Study conducted to investigate specific endpoints and described in a peer reviewed journal, read-across	–	–	–	–	–	–	–	x	No data	no guideline required
271-094-0	Study conducted to investigate specific endpoints and described in a peer reviewed journal, read-across	–	–	–	–	–	–	–	x	No data	no guideline required
203-953-2	acceptable, well-documented publication which meets basic scientific principles	–	–	–	–	–	–	–	–	yes (incl. Certificate)	–
204-709-8	meets generally accepted scientific standards, well-documented, and acceptable for assessment	–	–	–	–	–	–	–	–	No data	no guideline followed
234-186-1	Short-term feeding study. No information on the stability of the test substance in the diet or homogeneity of the test diets is provided. Purity of the test substance is not reported.	–	–	–	–	–	x	x	–	No data	no guideline followed
203-872-2	acceptable, well-documented publication which meets basic scientific principles.	–	–	–	–	–	–	–	–	No	–
201-126-0	Regarding specific topics (investigation of the respiratory tract) the study is well documented.	–	–	–	–	–	–	–	–	No	–
500-033-5	The study was not conducted according to guideline/s and GLP but the report contains sufficient data for interpretation of study results	–	–	–	x	–	–	–	–	No	no guideline followed
500-033-5	This study was conducted prior to GLP and test guidelines, but sufficient data is available for interpretation of results	–	–	–	x	–	–	–	–	No	–
203-539-1	The study (publication) contains sufficient data to permit a meaningful evaluation of study results	–	–	–	–	–	–	–	–	No data	no guideline available
203-539-1	The report (publication) contains sufficient information to permit a meaningful evaluation of study results	–	–	–	–	–	–	–	–	No	no guideline available
203-919-7	Published study which contains sufficient detail, including in results, to judge it reliable for hazard assessment purposes. Limited experimental detail provided.	x	–	–	–	–	x	–	–	No data	equivalent or similar to
203-919-7	A published study containing sufficient details to regard it as reliable for use in hazard assessment.	x	–	–	–	–	–	–	–	No data	equivalent or similar to
203-919-7	Published study which contains sufficient detail, including in results, to judge it reliable for hazard assessment purposes.	x	–	–	–	–	–	–	–	No data	equivalent or similar to
220-666-8	published study results; acceptable for assessment	–	–	–	–	–	–	–	–	No data	–
270-299-2	Acceptable, well-documented publication which meets basic scientific principles.	–	–	–	–	–	–	–	–	No	no guideline followed
603-931-6	Acceptable, well documented published GLP Guideline study.	–	x	–	–	–	–	–	–	Yes	–
603-931-6	Acceptable, well-documented publication meeting basic scientific principles	–	–	–	–	–	–	–	–	No data	equivalent or similar to
905-588-0	GLP compliant, guideline study, published in peer reviewed literature, fully adequate for assessment	–	x	–	–	–	–	–	–	Yes	according to
905-588-0	GLP status not known, non-guideline study, published in peer reviewed literature, limitations in design and/or reporting but otherwise adequate for assessment.	–	–	–	x	–	x	–	–	No data	no guideline followed
905-588-0	GLP status not known, non-guideline study, published in peer reviewed literature, limitations in design and/or reporting but otherwise adequate for assessment.	–	–	–	x	–	x	–	–	No data	no guideline followed
214-604-9	Study performed prior to international guidelines and GLPs using DecaBDE commercial product containing only 77% BDE 209 with 22% NonaBDEs adn 0.8% OctaBDEs.	–	–	x	–	–	x	x	–	–	equivalent or similar to
231-152-8	Reliable with restriction. Well documented. Not acoording to GLP nor to specific test guideline.	–	–	–	x	–	x	–	–	No	–
231-152-8	Reliable with restriction. Well documented. Not according to GLP Method not in compliance with ER 67/548/EEC, Annex V and OECD test guidelines	–	–	–	x	–	x	–	–	No	–
204-211-0	Study well documented, meets scientific standards, with retrictions (focus on proxisome proliferation)	–	–	–	–	–	x	x	–	No data	no guideline followed
204-211-0	Study well documented, meets scientific standards, with restrictions	–	–	–	–	–	x	–	–	No	no guideline available
204-211-0	comparable to guideline study with restrictions, acceptable for assessment	–	x	–	–	–	x	–	–	Yes	no guideline followed
204-211-0	Study well documented, similar to guideline study with restrictions acceptable for assessment	–	x	–	–	–	x	–	–	No data	no guideline followed
204-211-0	Comparable to guideline study with acceptable restrictions.	–	x	–	–	x	x	–	–	No data	equivalent or similar to
204-211-0	Study well documented, acceptable with restrictions (focus on lilver)	–	–	–	–	–	x	x	–	No	no guideline available
204-211-0	Study well documented, with restrictions	–	–	–	–	–	x	–	–	No	equivalent or similar to
204-211-0	Study well documented, meets generally accepted scientific principles, acceptable for assessment	–	–	–	–	–	–	–	–	No data	no guideline followed
204-211-0	Study well documented, meets accepted scientific principles, acceptable for assessment. Special focus on hepatic peroxysome proliferation.	–	–	–	–	–	x	x	–	No data	no guideline followed
204-211-0	Study well documented, meets generally accepted scientific principles, acceptable for assessment	–	–	–	–	–	–	–	–	No data	equivalent or similar to
204-211-0	Study well documented, meets generally accepted scientific standard, with acceptable restrictions ( focused on hepatic enzymes activities)	–	–	–	–	–	x	x	–	No	no guideline available
204-211-0	Study well documented, meets generally accepted scientific principles, acceptable for assessment	–	–	–	–	–	–	–	–	No data	no guideline followed
204-211-0	Study well documented, meets generally accepted scientific standard, with acceptable restrictions (focus on the liver)	–	–	–	–	–	x	x	–	No data	no guideline available
204-211-0	Meets national standard methods with acceptable restrictions	–	–	–	–	–	x	–	–	No data	equivalent or similar to
204-211-0	Study well documented, meets generally accepted scientific principles, acceptable for assessment	–	–	–	–	–	–	–	–	No data	no guideline available
204-211-0	Comparable to guideline study with acceptable restrictions	–	x	–	–	x	x	–	–	No data	equivalent or similar to
204-211-0	Study well documented, meets scientific princioples, with restrictions (low number of animals but special focus on enzymes activities)	–	–	–	–	–	x	x	–	No data	no guideline followed
204-211-0	Study well documented, meets accepted scientific principles, acceptable for assessment	–	–	–	–	–	–	–	–	No	equivalent or similar to
204-211-0	Comparable to guideline study with acceptable restrictions.	–	x	–	–	x	x	–	–	No data	equivalent or similar to
204-211-0	Study well documented, meets accepted scientific principles, acceptable for assessment. Special focus on hepatic peroxysome proliferation.	–	–	–	–	–	x	x	–	No data	no guideline followed
204-211-0	Meets generally accepted scientific standards and is described in sufficient detail.	–	–	–	–	–	–	–	–	No data	no guideline followed
204-211-0	study well documented, metts generally accepted scientific prinicples, acceptable for assessment	–	–	–	–	–	–	–	–	No data	no guideline followed
204-211-0	Study well documented, meets generally accepted scientific principles, acceptable for assessment	–	–	–	–	–	–	–	–	No data	no guideline followed
204-211-0	2e-Meets generally accepted scientific standards, well documented and acceptable for assessment. No information on purity of DEHP provided.	–	–	–	–	–	x	x	–	No data	no guideline followed
201-557-4	taken from EU RAR Dibutyl phthalate (2004)	–	–	–	–	–	–	–	–	No data	no guideline available
	Total	3	7	1	6	4	24	10	2
Publication; adequacy not specified		Analysis of rational for reliability								Reported GLP and test guideline compliance
		Reliability specified	GLP and/or guideline	Pre-GLP and/or pre-guideline	Non-GLP and/or non-guideline	Only GLP and/or guideline	Restriction	Restriction specified	Read-across	GLP compliance	Test guideline qualifier
204-211-0	Study well documented, acceptable with restrictions	–	–	–	–	–	x	–	–	No data	equivalent or similar to
204-211-0	Study well documented, meets generally accepeted scientific principles, with acceptable retrictions (focus on the hepatic effetcs)	–	–	–	–	–	x	x	–	No data	no guideline followed
204-211-0	Study well documented, meets generally accepted scientific principles, acceptable for assessment	–	–	–	–	–	–	–	–	No	no guideline available
204-211-0	Study well documented, meets generally accepted scietnific principles, acceptable for assessment	–	–	–	–	–	–	–	–	No data	no guideline followed
204-211-0	Acceptable, well documented publication which meets basic scientific principles	–	–	–	–	–	–	–	–	No data	no guideline followed
204-211-0	2e-Meets generally accepted scientific standards, well documented and acceptable for assessment. No information on purity of DEHP provided.	–	–	–	–	–	x	x	–	No data	no guideline followed
	Total	0	0	0	0	0	3	2	0
Publication; weight of evidence		Analysis of rational for reliability								Reported GLP and test guideline compliance
		Reliability specified	GLP and/or guideline	Pre-GLP and/or pre-guideline	Non-GLP and/or non-guideline	Only GLP and/or guideline	Restriction	Restriction specified	Read-across	GLP compliance	Test guideline qualifier
203-953-2	acceptable, well-documented publication which meets basic scientific principles	–	–	–	–	–	–	–	–	No data	equivalent or similar to
203-953-2	basic information given	–	–	–	–	–	–	–	–	No data	–
203-953-2	basic information given	–	–	–	–	–	–	–	–	No data	–
	Total	0	0	0	0	0	0	0	0

## Sheet: SI Table c (Reliability 3)
Reliability category 3
Table c. Analysis of the rationales for reliability provided in the field "Rationales for reliability incl. deficiencies" for study summaries assigned reliability category 3 as well as reported GLP and test guideline compliance in the fields “GLP compliance” and “test qualifier”. Data on the endpoint repeated dose toxicity was retrieved for 60 substances from the lead registration dossiers in the…
Study report; supporting study		Analysis of rational for reliability							GLP and test guideline fields
EC number	Reported rational for reliability incl. deficiences	Reliability specified	GLP and/or guideline	Non-GLP and/or non-guideline	Restriction	Restriction specified	Insufficient reporting	Methodological deficiencies	GLP compliance	Test guideline qualifier
213-561-3	Does not meet important criteria of today standard methods (e.g. restricted range of examinations, only 4 days post observation period, no reporting of individual/mean datat)	–	–	–	x	x	–	–	No data	–
213-561-3	Does not meet important criteria of today standard methods (e.g. restricted range of examinations, only 4 days post observation period, no reporting of individual/mean data)	–	–	–	x	x	–	–	No data	–
	Total	0	0	0	2	2	0	0
Study report; disregarded study		Analysis of rational for reliability							Reported GLP and test guideline compliance
EC number	Reported rational for reliability incl. deficiences	Reliability specified	GLP and/or guideline	Non-GLP and/or non-guideline	Restriction	Restriction specified	Insufficient reporting	Methodological deficiencies	GLP compliance	Test guideline qualifier
222-182-2	The study conduct was based on the procedure described by Sachsse et al. (1973, 1976). The initially highest selected concentration level of 1.3 mg/L air had resulted in mortalities, and the test concentration was changed/lowered from the second day of treatment to 0.301 mg/L air until test ending. Because of the increased mortility rate observed from day 2 to 15 and since the animals exposed to …	x	x	–	x	x	–	–	No	equivalent or similar to
	Total	1	1	0	1	1	0	0
Study report; adequacy not specified		Analysis of rational for reliability							Reported GLP and test guideline compliance
EC number	Reported rational for reliability incl. deficiences	Reliability specified	GLP and/or guideline	Non-GLP and/or non-guideline	Restriction	Restriction specified	Insufficient reporting	Methodological deficiencies	GLP compliance	Test guideline qualifier
203-710-0	documentation deficiencies.	–	–	–	x	–	x	–	No	no guideline followed
939-340-8	Comparable to guideline study with acceptable restrictions (14-day exposure, only 10 males/group and additional recovery groups of 5); mainly GLP, test substance of higher molecular weight oligomers and therefore not equivalent to registered substance.	–	x	–	x	x	–	–	Yes	equivalent or similar to
	Total	0	1	0	2	1	1	0
Publication; supporting study		Analysis of rational for reliability							Reported GLP and test guideline compliance
EC number	Reported rational for reliability incl. deficiences	Reliability specified	GLP and/or guideline	Non-GLP and/or non-guideline	Restriction	Restriction specified	Insufficient reporting	Methodological deficiencies	GLP compliance	Test guideline qualifier
231-152-8	not reliable. Insufficient documentation for assessment.	–	–	–	x	–	x	–	No data	–
231-152-8	Not reliable. Not according to GLP nor to specific testing guidelines. Insufficient data for assessment	–	–	x	x	–	x	–	No data	–
231-152-8	Not reliable. Not according to GLP nor to specific testing guidelines. Insufficient data for assessment.	–	–	x	x	–	x	–	No data	–
231-152-8	Not reliable. Insufficient documentation for assessment.	–	–	–	x	–	x	–	No data	–
201-557-4	taken from EU RAR Dibutyl Phthalate (2004)	–	–	–	–	–	–	–	No data	no guideline followed
	Total	0	0	2	4	0	4	0
Publication; disregarded study		Analysis of rational for reliability							Reported GLP and test guideline compliance
EC number	Reported rational for reliability incl. deficiences	Reliability specified	GLP and/or guideline	Non-GLP and/or non-guideline	Restriction	Restriction specified	Insufficient reporting	Methodological deficiencies	GLP compliance	Test guideline qualifier
203-919-7	Significant methodological deficiencies. Details on results not provided. No details on systemic examinations conducted. No information on total amount of substance applied. No data on impurity of test substance.	–	–	–	x	x	–	x	No	no guideline followed
203-919-7	Significant methodological deficiencies. Overall purity of material is unknown and statistical analyses were not performed. Control data insufficient. \Study only reports a repeat dose LD50.	–	–	–	x	x	–	x	No	no guideline followed
214-604-9		–	–	–	–	–	–	–	No	equivalent or similar to
284-325-5	Ashby and Odum (Environ Health Perspect, 106, A315-316, 1998) draw attention to the fact that the positive control (DES) data reported for this study also appear in two other reports by Colerangle and Roy (1995 and 1997), and that the vehicle control data of the nonylphenol study is duplicated in the 1997 study. This raises some uncertainties as whether the control data were generated concurrentl…	–	–	–	x	x	–	–	–	no guideline followed
	Total	0	0	0	3	3	0	2
Publication; adequacy not specified		Analysis of rational for reliability							Reported GLP and test guideline compliance
EC number	Reported rational for reliability incl. deficiences	Reliability specified	GLP and/or guideline	Non-GLP and/or non-guideline	Restriction	Restriction specified	Insufficient reporting	Methodological deficiencies	GLP compliance	Test guideline qualifier
204-211-0	Study well documented , meets generally scientific principles, but with significant methodological deficiences	–	–	–	x	–	–	x	No	no guideline followed
204-211-0	one dose level, one gender, low number of animals, exploratory study	–	–	–	x	x	–	–	No	no guideline followed
204-211-0	Study well documented , meets generally scientific principles, but with significant methodological deficiences	–	–	–	x	–	–	x	No	no guideline followed
204-211-0	Documentation insufficient for assessment (no purity, no data on experimental conditions, males only, 4-5 animals per group only, no examination of haematology, urine, ophtalmoscopy, no detailled results)	–	–	–	x	x	x	–	No	no guideline followed
204-211-0	Documentation insufficient for assessment	–	–	–	x	–	x	–	Yes	equivalent or similar to
204-211-0	Documentation insufficient for assessment (no details on sample or on animals, no indication on analytical method, no individual data). Special focus on thyroid	–	–	–	x	x	x	–	No data	no guideline followed
204-211-0	Documentation insufficient for assessment (no details on sample or on animals, no indication on analytical method, Special focus on lipid metabolism )	–	–	–	x	x	x	–	No data	no guideline followed
204-211-0	Documentation insufficient for assessment (no purity, males only, one concentration, no results on DEHP exposure, focus on liver enzymes activities and but no clinical signs, ...)	–	–	–	x	x	x	–	No data	no guideline followed
204-211-0	documentation insufficient for assessment (no purity, no experimental conditions, no estimation of the compound intake, no detailed results)	–	–	–	x	x	x	–	No data	no guideline followed
204-211-0	Significant methodological deficiences: Number of animals insufficient (n=2). No data on the test material.	–	–	–	x	x	–	x	No	no guideline available
204-211-0	Documentation insufficient for assessment (no data on purity, not enough data on animals, males only, no exact number of animals indicated, no details on methods)	–	–	–	x	x	x	–	No	no guideline followed
204-211-0	Documentation insufficient for assessment (no data on materials, no detailed methods, special focus on liver)	–	–	–	x	x	x	–	No	no guideline available
204-211-0	Significant methodological deficiences (no purity, only 4 animals per group, no data on the experimental conditions, gavage 3 times a week, special focus on kidney but no data on the other organs...)	–	–	–	x	x	–	x	No data	no guideline available
204-211-0	Study well documented , meets generally scientific principles, but with significant methodological deficiences	–	–	–	x	–	–	x	No	no guideline followed
204-211-0	Documentation insufficient dor assessment (no purity, no data on exxperimental conditions, 5 animals only, males only, no examination of haematology, urine, biochemistry, ophtalmology)	–	–	–	x	x	x	–	No data	no guideline followed
204-211-0	Significant methodological deficiences (insufficient number of animals, no data on food consumption (i.e. exposure), special focus on liver morphology and biochemistry)	–	–	–	x	x	–	x	No data	no guideline available
204-211-0	one dose level, one gender, low number of animals, exploratory study	–	–	–	x	x	–	–	No	no guideline followed
204-211-0	This study is considered to be of a limited quality with respect to risk assessment of adverse effects following inhalation of DEHP as the documentation is insufficient for an assessment.	–	–	–	x	–	x	–	No	no guideline followed
204-211-0	Significant methodological deficiences	–	–	–	x	–	–	x	No	no guideline followed
204-211-0	Due to several shortcomings, this study is not adequate for hasard assessment.	–	–	–	x	–	–	–	No	no guideline followed
204-211-0	Significant methodological deficiences Documentation insufficient for assessment	–	–	–	x	–	x	x	No	no guideline followed
	Total	0	0	0	21	13	11	8

## Sheet: SI Table d (Reliability 4)
Reliability category 4
Table d. Analysis of the rationales for reliability provided in the field "Rationales for reliability incl. deficiencies" for study summaries assigned reliability category 4 as well as reported GLP and test guideline compliance in the fields “GLP compliance” and “test qualifier”. Data on the endpoint repeated dose toxicity was retrieved for 60 substances from the lead registration dossiers in the…
Study report; supporting study		Analysis of rational for reliability									Reported GLP and test guideline compliance
EC number	Reported rational for reliability incl. deficiences	Reliability specified	GLP and/or guideline	Pre-GLP and/or pre-guideline	Non-GLP and/or non-guideline	Restriction	Restriction specified	Insufficient reporting/ documentation	Only abstract available	Documentation not available	GLP compliance	Test guideline qualifier
222-182-2	The study was conducted in the sixties, i.e., prior to the implementation of GLP and Testing guidelines. Moreover, only few data on the test material used were provided.	–	–	x	–	x	x	x	–	–	No	no guideline followed
248-131-4	This study is classified as reliable not assignable because this study only examined one dose level, and systemic toxicity was not evaluated.	x	–	–	–	x	x	–	–	–	No	equivalent or similar to
500-033-5	Documentation insufficient for assessment.	–	–	–	–	x	–	x	–	–	No data	no guideline followed
203-539-1		–	–	–	–	–	–	–	–	–	No data	–
201-250-5	Only short abstract available, non standard study, exposure time only 13 days	–	–	–	x	x	x	–	x	–	No	no guideline followed
934-268-3	This study is classified as reliable not assignable because this study only examined one dose level, and systemic toxicity was not evaluated.	x	–	–	–	x	x	–	–	–	No	equivalent or similar to
202-969-7	GLP and guideline study (method B.26 sub-chronic oral toxicity), but limited documentation of histopathology (grading system used is not indicated, only short description of findings given, no historical control data of histopathology given); more data needed for re-evaluation and assessment of adversity and reversibility of the described macroscopic and histopathologic lesions (see comments: R. …	–	x	–	–	x	x	x	–	–	Yes	according to
284-325-5	only abstract available; summarized in EU RAR 2002	–	–	–	–	x	–	–	x	–	–	–
	Total	2	1	1	1	7	5	3	2	0
Study report; adequacy not specified		Analysis of rational for reliability									Reported GLP and test guideline compliance
EC number	Reported rational for reliability incl. deficiences	Reliability specified	GLP and/or guideline	Pre-GLP and/or pre-guideline	Non-GLP and/or non-guideline	Restriction	Restriction specified	Insufficient reporting/ documentation	Only abstract available	Documentation not available	GLP compliance	Test guideline qualifier
204-211-0	Documentation not available Data provided by the EU Risk assessment 2008	–	–	–	–	x	–	–	–	x	Yes	no guideline available
204-211-0	Documentation not available Data provided by the TSCATS	–	–	–	–	x	–	–	–	x	Yes	equivalent or similar to
204-211-0	Documentation not available Data provided by the EU Risk assessment 2008	–	–	–	–	x	–	–	–	x	No	no guideline available
204-211-0	Documentation not available Data provided by the TSCATS	–	–	–	–	x	–	–	–	x	No	no guideline available
204-211-0	Documentation not available Data provided by the EU Risk assessment 2008	–	–	–	–	x	–	–	–	x	Yes	equivalent or similar to
204-211-0	Documentation not available Data provided by the EU Risk assessment 2008	–	–	–	–	x	–	–	–	x	Yes	no guideline followed
204-211-0	Documentation not available Data provided by the TSCATS	–	–	–	–	x	–	–	–	x	No	no guideline available
204-211-0	Documentation not available Data provided by the EU Risk assessment 2008	–	–	–	–	x	–	–	–	x	No	no guideline available
202-969-7	study report does not give sufficient experimental details	–	–	–	–	x	–	x	–	–	No	–
204-211-0	Documentation not available Data provided by the TSCATS	–	–	–	–	x	–	–	–	x	Yes	no guideline available
204-211-0	Documentation not available Data provided by the EU Risk assessment 2008	–	–	–	–	x	–	–	–	x	No	no guideline available
204-211-0	Documentation not available Data from the TSCTAS	–	–	–	–	x	–	–	–	x	No	no guideline available
204-211-0	Documentation not available Data provided by the EU Risk assessment 2008	–	–	–	–	x	–	–	–	x	Yes	according to
204-211-0	Documentation not available Data provided by the EU Risk assessment 2008	–	–	–	–	x	–	–	–	x	Yes	according to
204-211-0	Documentation not available Data provided by the TSCATS (probably rel3: no data on purity, males only, 5 animals per group, one dose, no exzamination of hematological or chemical parameters, urine)	–	–	–	–	x	x	–	–	x	Yes	equivalent or similar to
	Total	0	0	0	0	15	1	1	0	14
Publication; supporting study		Analysis of rational for reliability									Reported GLP and test guideline compliance
EC number	Reported rational for reliability incl. deficiences	Reliability specified	GLP and/or guideline	Pre-GLP and/or pre-guideline	Non-GLP and/or non-guideline	Restriction	Restriction specified	Insufficient reporting/ documentation	Only abstract available	Documentation not available	GLP compliance	Test guideline qualifier
234-186-1	Limited information on methodology; documentation insufficient for assessment.	–	–	–	–	x	–	x	–	–	No	no guideline followed
225-878-4	only abstract available	–	–	–	–	x	–	x	x	–	No data	equivalent or similar to
231-152-8	not assignable: source publications not available, insufficient experimental data.	x	–	–	–	x	x	x	–	–	No data	–
	Total	1	0	0	0	3	2	3	1	0
Publication; weight of evidence		Analysis of rational for reliability									Reported GLP and test guideline compliance
EC number	Reported rational for reliability incl. deficiences	Reliability specified	GLP and/or guideline	Pre-GLP and/or pre-guideline	Non-GLP and/or non-guideline	Restriction	Restriction specified	Insufficient reporting/ documentation	Only abstract available	Documentation not available	GLP compliance	Test guideline qualifier
203-539-1	Published data with limited information on the methods and results.	–	–	–	–	x	–	x	–	–	No data	equivalent or similar to
	Total	0	0	0	0	1	0	1	0	0
Publication; adequacy not specified		Analysis of rational for reliability									Reported GLP and test guideline compliance
EC number	Reported rational for reliability incl. deficiences	Reliability specified	GLP and/or guideline	Pre-GLP and/or pre-guideline	Non-GLP and/or non-guideline	Restriction	Restriction specified	Insufficient reporting/ documentation	Only abstract available	Documentation not available	GLP compliance	Test guideline qualifier
201-133-9	Documentation insufficient for assessment, only russian abstract available.	–	–	–	–	x	–	x	x	–	No data	no guideline followed
202-969-7	publication does not give sufficient experimental details	–	–	–	–	x	–	x	–	–	–	–
202-969-7	publication does not give sufficient experimental details	–	–	–	–	–	–	x	–	–	–	–
202-969-7	publication does not give sufficient experimental details	–	–	–	–	–	–	x	–	–	–	–
202-969-7	publication does not give sufficient experimental details	–	–	–	–	–	–	x	–	–	–	–
202-969-7	publication does not give sufficient experimental details	–	–	–	–	–	–	x	–	–	–	–
202-969-7	only short abstract available	–	–	–	–	x	–	x	x	–	–	–
202-969-7	publication does not give sufficient experimental details	–	–	–	–	x	–	x	–	–	–	–
202-969-7	publication does not give sufficient experimental details	–	–	–	–	x	–	x	–	–	–	–
204-211-0	Documentation not available Data provided by the EU Risk assessment 2008	–	–	–	–	x	–	x	–	–	No data	no guideline followed
204-211-0	only abstract available	–	–	–	–	x	–	x	x	–	No data	–
204-211-0	Abstract only	–	–	–	–	x	–	x	x	–	No data	no guideline followed
204-211-0	Abstract only	–	–	–	–	–	–	–	x	–	No data	no guideline followed
	Total	0	0	0	0	8	0	12	5	0

## Sheet: SI Table e (No of SS per subs.)
Table e. Number of study summaries for the endpoint repeated dose toxicity registered per substance in the lead registration dossier. The study comprised 60 substances in total.
No of study summaries registered per substance	No of substances per reliability category
	1	2	3	4
1-5	39	38	9	11
5-10	4	6	0	1†
>10 (DEHP)	0	1	1	1
Total subst.	43	45	10	12
†10 study summaries registered

## Sheet: SI Table f (GLP and test guid.)
Table f. Reported GLP and test guideline compliance in the study summaries for the endpoint repeated dose toxicity for a selection of 60 substances. The category "Not following any guideline" includes the picklist categories "no guideline followed, "no guideline available" and "no guideline required" in IUCLID.
Reliability category	Reference type	Test guideline qualifier				GLP compliance
		According to	Equivalent or similar to	Not following any guideline	Not specified by registrant	Yes	No	No data	Not specified by registrant
1	Study report	72	24	2	2	91	1	2	6
	Publication	6	0	0	1	6	0	1	0
2	Study report	12	36	26	13	38	33	15	1
	Publication	6	19	35	20	9	22	48	1
3	Study report	0	2	1	2	1	2	2	0
	Publication	0	2	24	4	1	16	12	1
4	Study report	3	5	11	4	9	11	2	1
	Publication	0	2	5	10	0	1	8	8
